# Supplementary material
Source: publisher site journal article supplement (https://www.dovepress.com/article/551667)
Supplement: Supplementary file 1 [file 551667%20Revised%20%2509Supplementary.pdf]

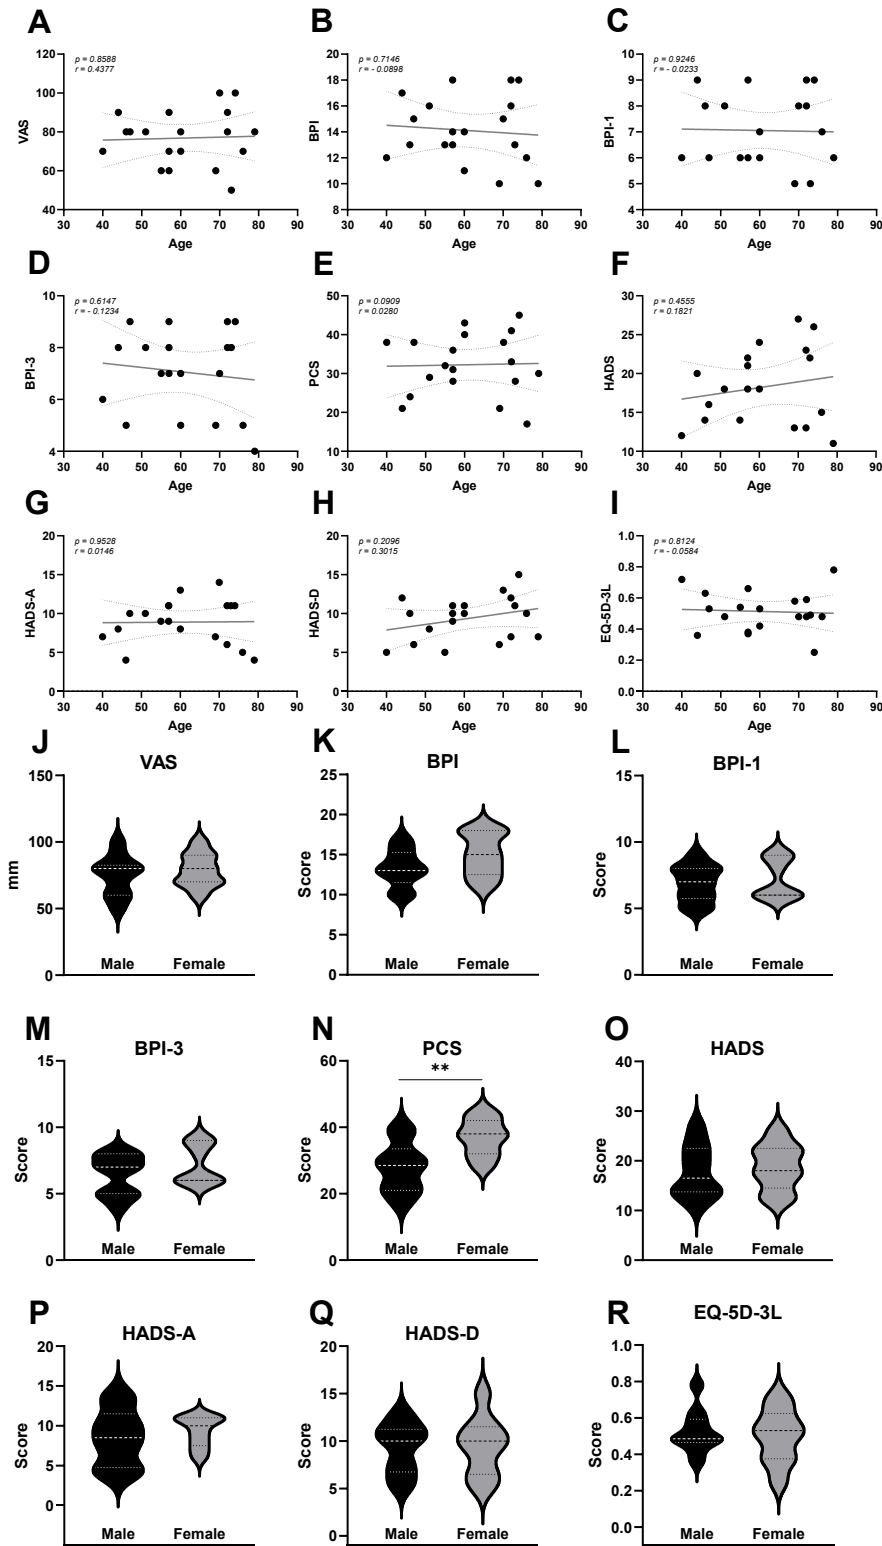

**Supplementary Figure 1** | Differences in baseline clinical outcomes (t0) based on (A-I) patient age or (J-R) gender. VAS, Visual analogue scale (pain severity); BPI, Brief Pain Inventory (which includes BPI-1 – intensity and BPI-3 - interference); PCS, Pain Catastrophizing Scale; HADS, Hospital Anxiety-Depression Scale (which includes HADS-A – anxiety and HADS-D -depression); EQ-5D-3L, Euro Quality of Life Scale. (A-I) Correlation between clinical parameters and age of patients and (J-R) violin plots of clinical parameters based on age. Data from 19 patients were reported. Statistical analysis was performed by (A-I) Pearson's Correlation and (J-R) unpaired t-test. \*\* $p < 0.01$  vs. t0. p, p-value; r, Pearson's correlation coefficient; mm, millimeters.

| Correlations |          | p      | r        |
|--------------|----------|--------|----------|
| VAS vs.      | BPI-3    | 0.1639 | 0.3328   |
|              | PCS      | 0.1702 | 0.3281   |
|              | HADS     | 0.1958 | 0.3104   |
|              | HADS-A   | 0.6308 | 0.1179   |
|              | HADS-D   | 0.0741 | 0.4191   |
|              | EQ-5D-3L | 0.0654 | - 0.4310 |
| BPI-1 vs.    | PCS      | 0.7324 | 0.0840   |
|              | HADS     | 0.1336 | 0.3569   |
|              | HADS-A   | 0.6872 | 0.09887  |
| BPI-3 vs.    | PCS      | 0.2021 | 0.3063   |
|              | HADS-D   | 0.1913 | 0.3135   |
| PCS vs.      | HADS     | 0.1876 | 0.3159   |
|              | HADS-A   | 0.0622 | 0.4358   |
|              | HADS-D   | 0.6693 | 0.1048   |
|              | EQ-5D-3L | 0.7223 | - 0.0873 |
| HADS-A       | EQ-5D-3L | 0.0514 | - 0.4530 |

**Supplementary Table 1 | Baseline correlation clinical outcomes.** VAS, Visual analogue scale (pain severity); BPI, Brief Pain Inventory (1-intensity; 3-interference); PCS, Pain Catastrophizing Scale; HADS, Hospital Anxiety-Depression Scale (which includes HADS-A – anxiety and HADS-D - depression); EQ-5D-3L, Euro Quality of Life Scale. Statistical significance (p, p-value) and trend (r, Pearson's correlation coefficient - positive or negative) of baseline time (t0) correlations of clinical data from 19 patients were reported. Statistical analysis was performed by Pearson's correlation coefficients.

| Correlations |          | p      | r         |
|--------------|----------|--------|-----------|
| VAS vs.      | BPI-1    | 0.4394 | 0.5606    |
|              | BPI-3    | 0.2615 | 0.7385    |
|              | PCS      | 0.1951 | 0.8049    |
|              | HADS     | 0.3152 | 0.6848    |
|              | HADS-A   | 0.3553 | 0.6447    |
|              | HADS-D   | 0.2542 | 0.7458    |
|              | EQ-5D-3L | 0.1828 | 0.8172    |
| BPI-1 vs.    | PCS      | 0.0652 | 0.9348    |
|              | HADS     | 0.1225 | 0.8775    |
|              | HADS-A   | 0.0965 | 0.9035    |
|              | HADS-D   | 0.0537 | 0.9463    |
|              | EQ-5D-3L | 0.1005 | - 0.08995 |
| BPI-3 vs.    | HADS     | 0.1391 | 0.8609    |
|              | HADS-A   | 0.1271 | 0.8729    |
|              | EQ-5D-3L | 0.0631 | - 0.9369  |
| PCS vs.      | HADS     | 0.0563 | 0.9435    |
|              | HADS-A   | 0.0572 | 0.9428    |

**Supplementary Table 2 | Correlation clinical outcomes over time.** VAS, Visual Analogue Scale (pain severity); BPI, Brief Pain Inventory (1-intensity and 3-interference); PCS, Pain Catastrophizing Scale; HADS, Hospital Anxiety-Depression Scale (which includes HADS-A – anxiety and HADS-D - depression); EQ-5D-3L, Euro Quality of Life Scale. Statistical significance (p, p-value) and trend (r, Pearson's correlation coefficient - positive or negative) correlations of clinical data from 19 patients are shown. Statistical analysis was performed by Pearson's correlation coefficients.
